# Supplementary material for: Transparent photovoltaic memory for neuromorphic device
Source: Royal Society of Chemistry journal article supplement (doi:10.1039/d0nr08966d), 2021-01-01
Supplement: d0nr08966d1.pdf [file d0nr08966d1.pdf]

## Supporting Information

### Transparent Photovoltaic Memory Device

Priyanka Bhatnagar <sup>a,b</sup>, Thanh Tai Nguyen <sup>a,b</sup>, Sangho Kim <sup>a,b</sup>, Ji Heun Seo <sup>a,b</sup>,  
Malkeshkumar Patel <sup>a,b,\*</sup> and Joondong Kim <sup>a,b,\*</sup>

<sup>a</sup> *Photoelectric and Energy Device Application Lab (PEDAL), Multidisciplinary Core Institute for Future Energies (MCIFE), Incheon National University, 119 Academy Rd. Yeonsu, Incheon, 22012, Republic of Korea.*

<sup>b</sup> *Department of Electrical Engineering, Incheon National University, 119 Academy Rd. Yeonsu, Incheon, 22012, Republic of Korea*

\*Corresponding authors' E-mails: mpatel@inu.ac.kr (M. Patel) and joonkim@inu.ac.kr (J. Kim)

+ Electronic supplementary information (ESI) available

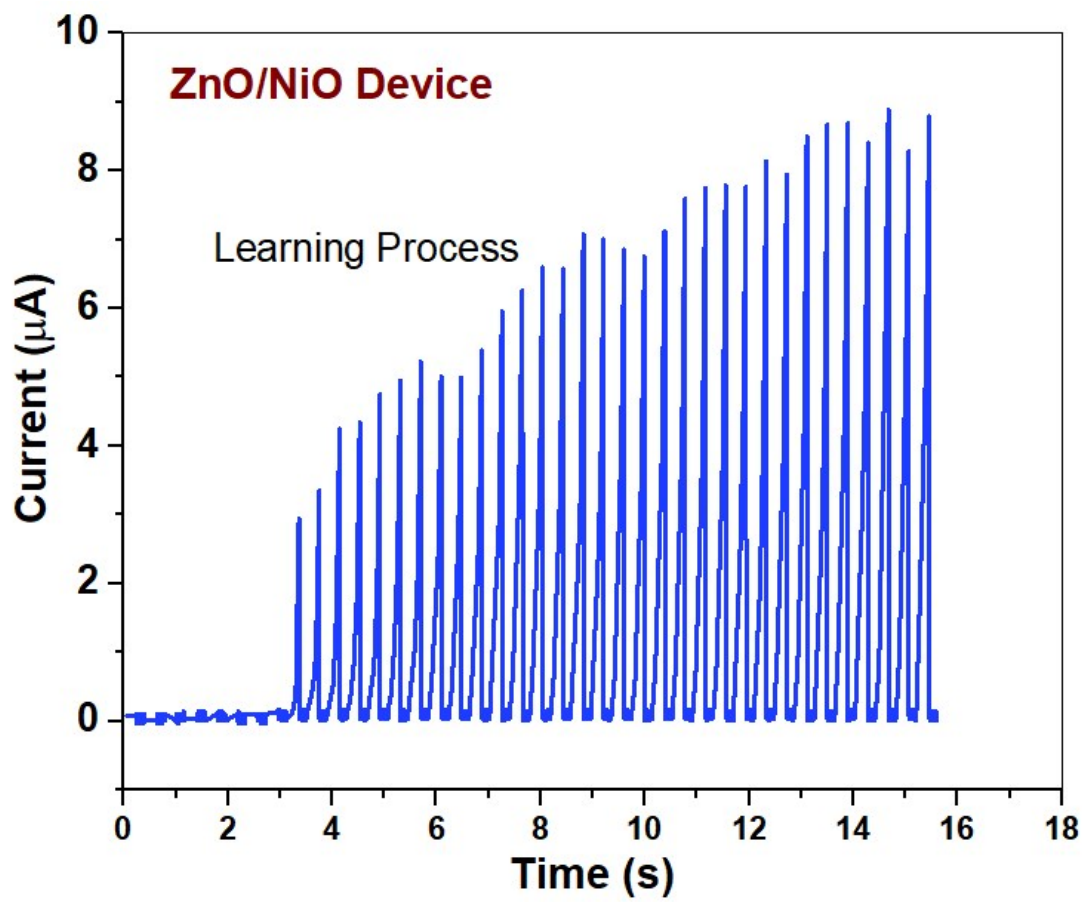

**Figure S1.** Retention characteristics of the device upon the application of consecutive voltage pulses of 3 V.

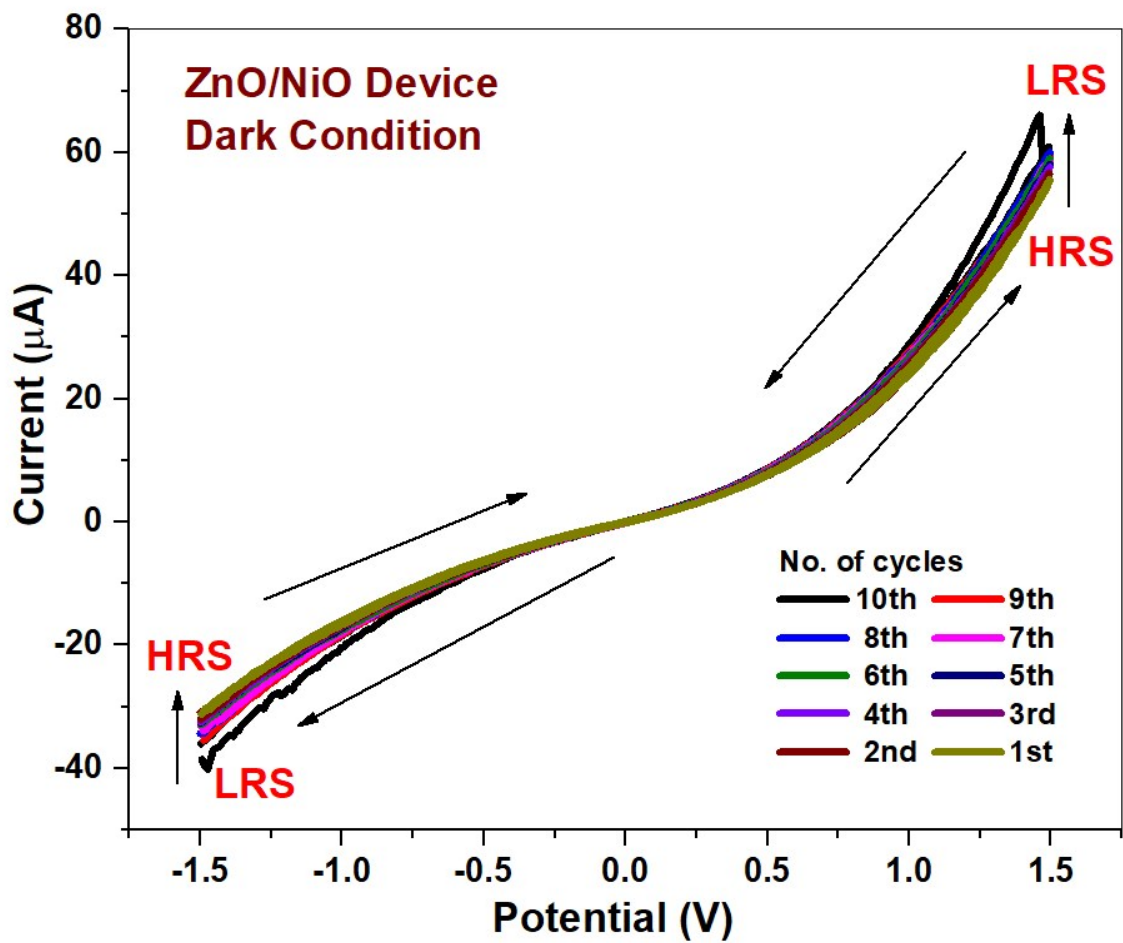

**Figure S2.** I-V curves of the ZnO/NiO device in dark for 10 sweeping cycles. The graph illustrates the stability of the device after 10 sweeping cycles.

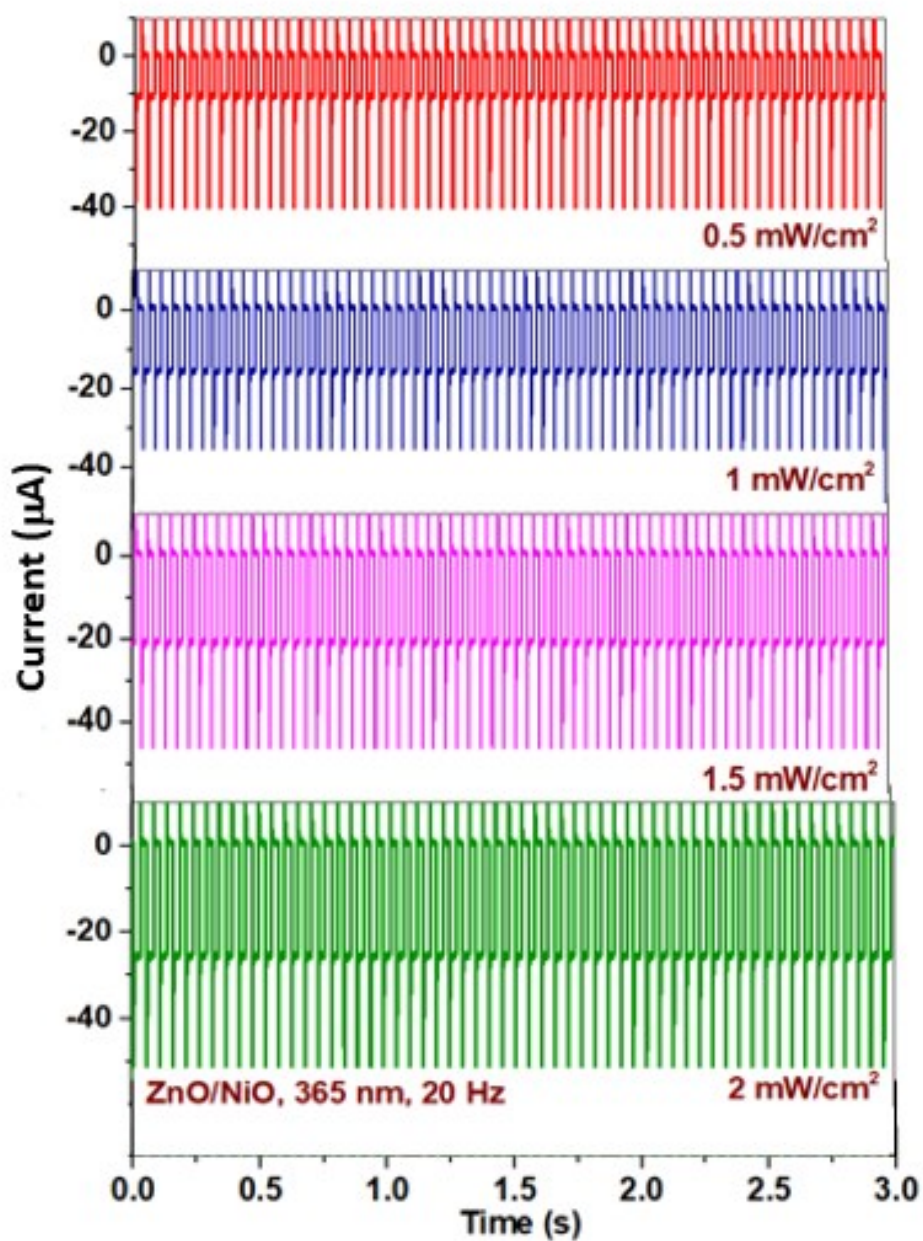

**Figure S3.** Receptive behavior of the device with varying intensity of UV light as a function of time. The device maintained a constant output response until the UV light radiation was removed, which shows its stable receptive behavior.

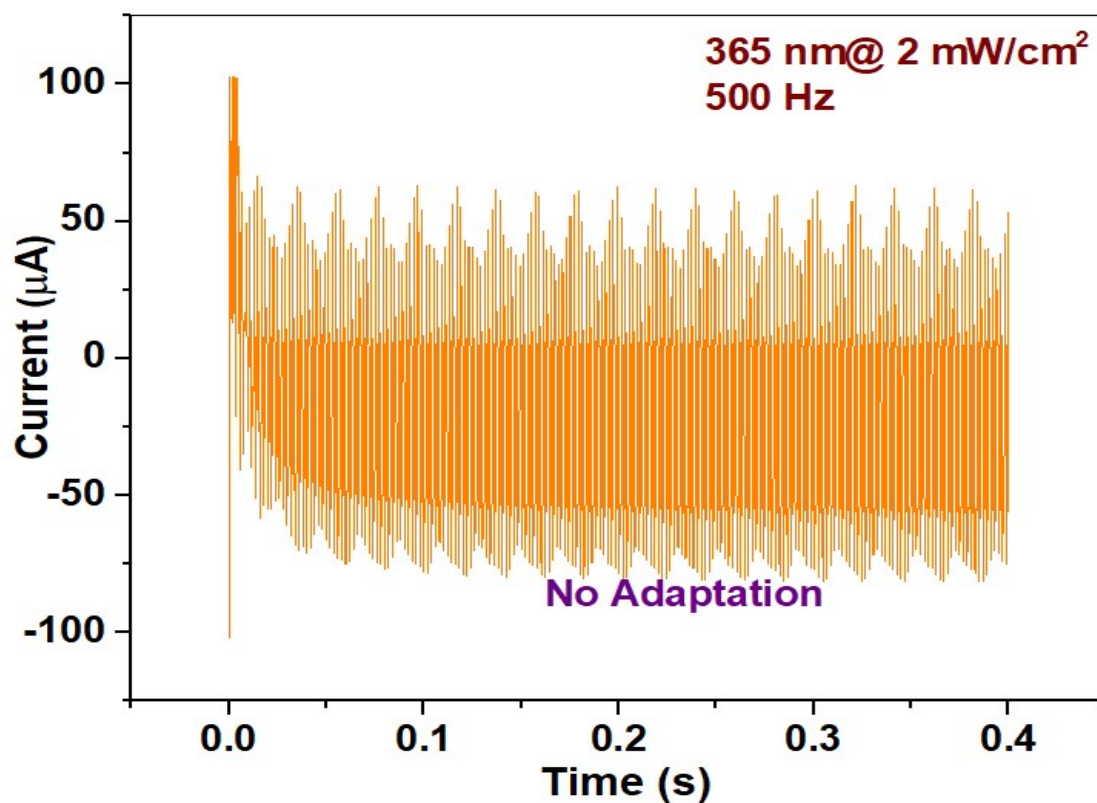

**Figure S4.** Current–time plot showing no adaptation feature of the device, behaving as a nociceptor for the incoming UV light. The photoresponse increased for a certain intensity of UV light and then saturated.

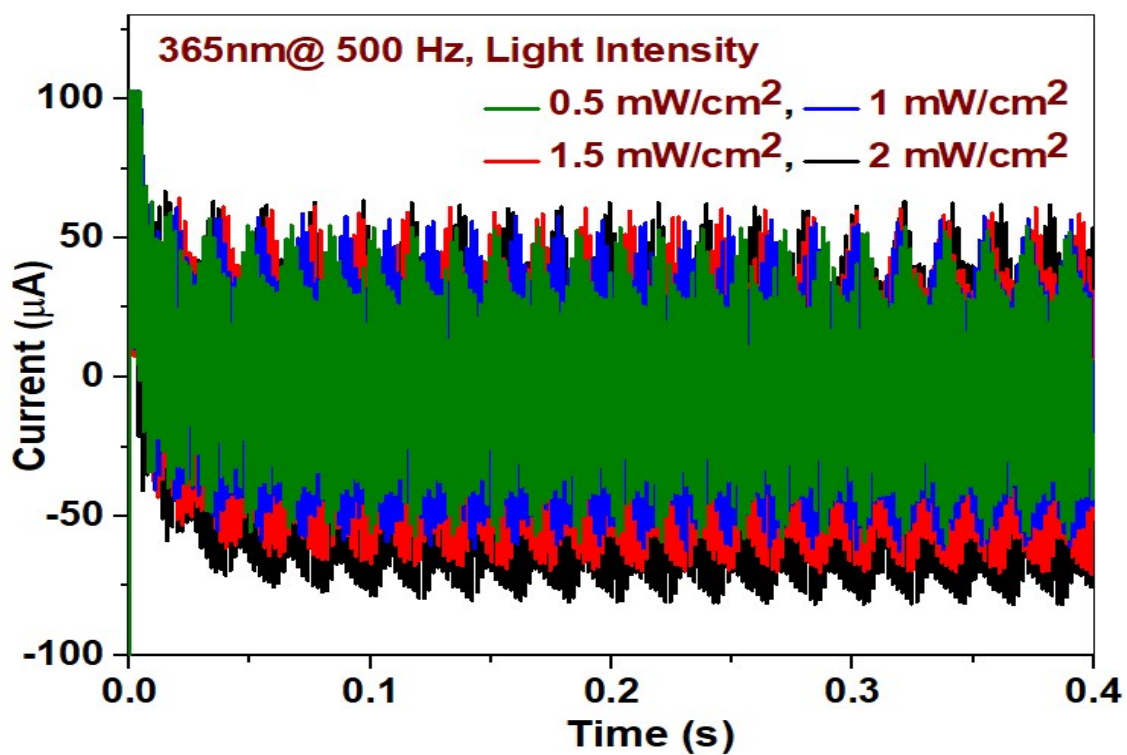

**Figure S5.** The current–time plot shows the nociceptor behavior of the device with varying intensity of UV light. The photoresponse of the device increased with the intensity of the incoming radiation.

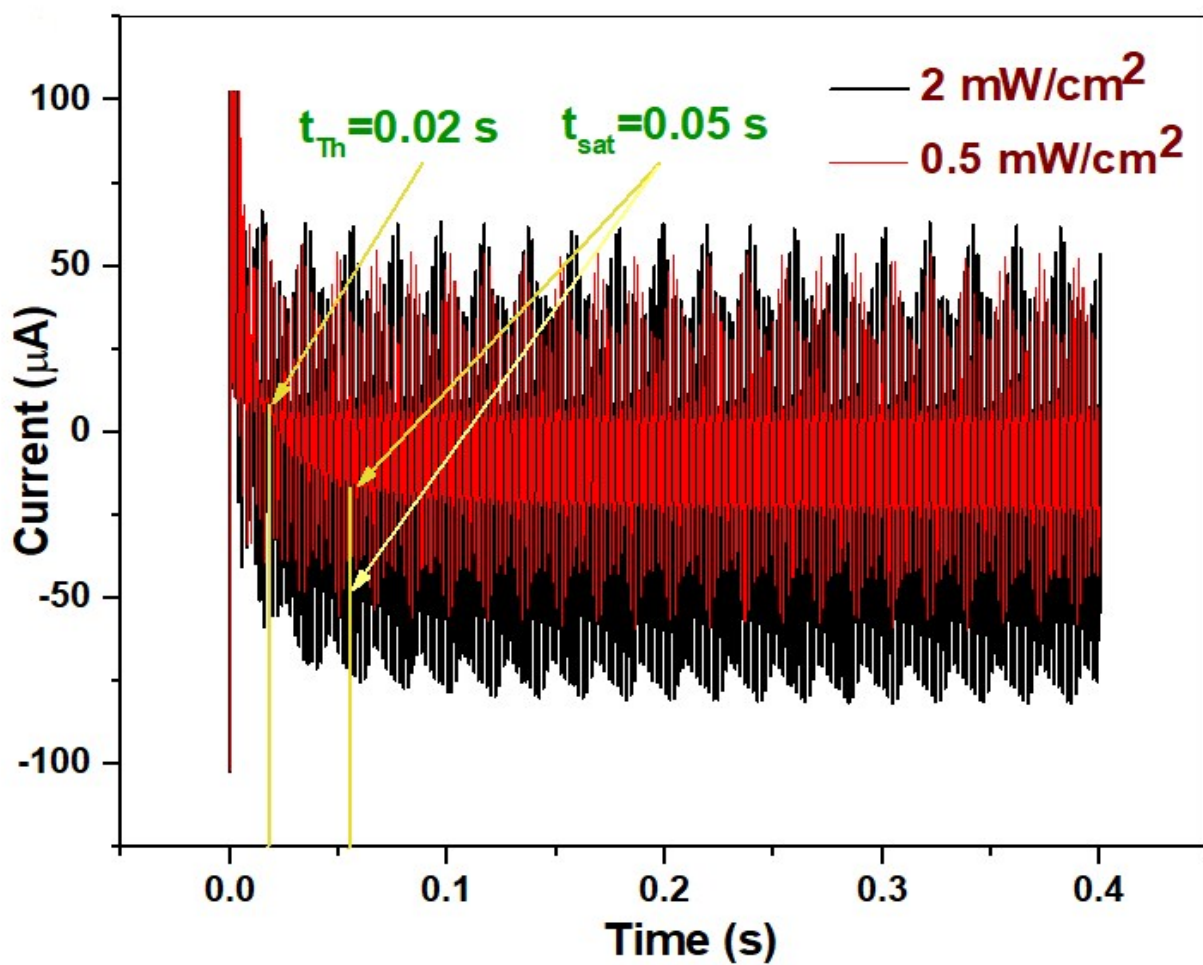

**Figure S6.** Threshold and saturation characteristics of the device. The threshold and saturation time of the device were the same for low- and high-intensity signals, which shows the harsh response of the device to noxious stimuli.

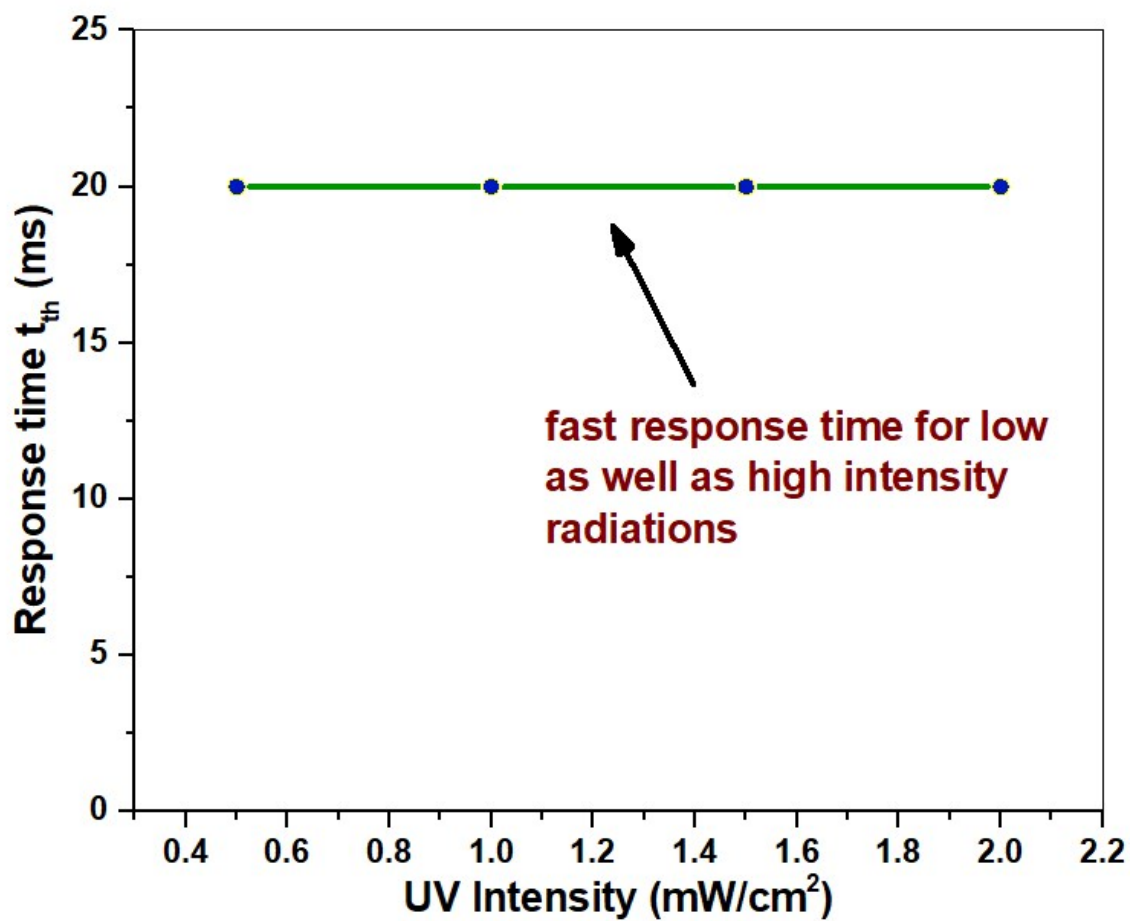

**Figure S7.** Response time of the device. It was the same for low- and high-intensity signals, which shows its harsh response to noxious stimuli.



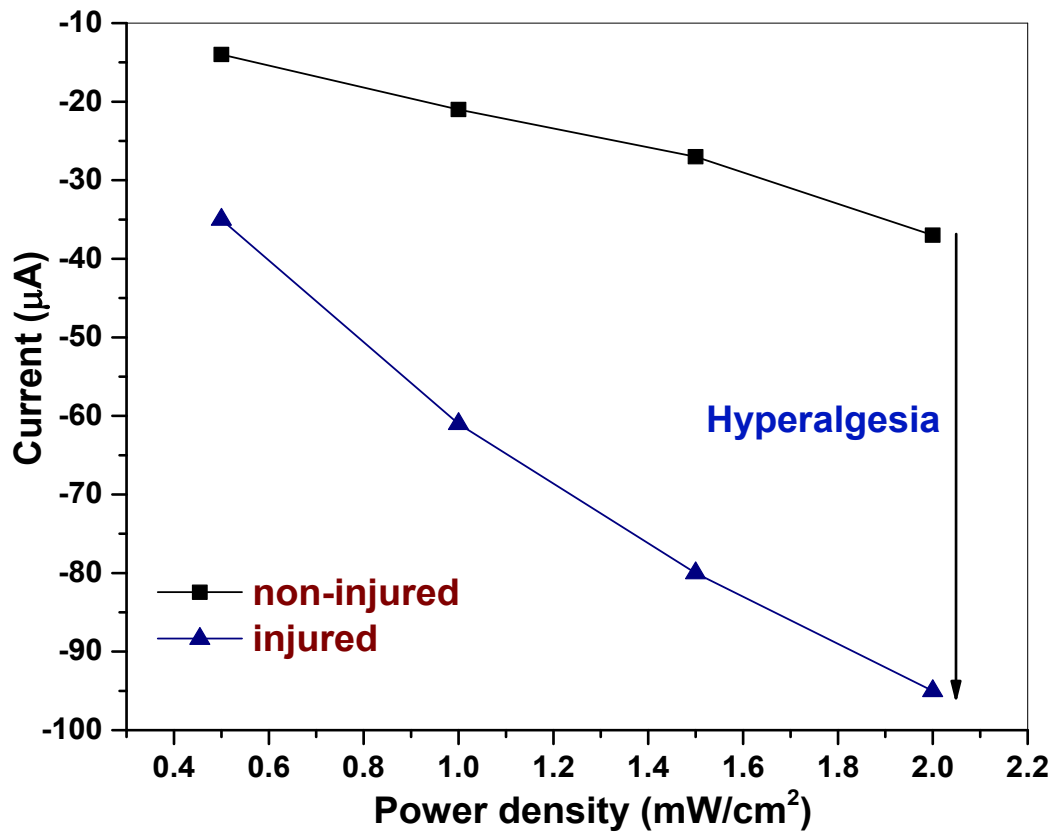

**Figure S8.** Device exhibiting Hyperalgesia property of the nociceptor which highlights how the damaged tissue enhanced the response even for low light illumination.
